# Supplementary material for: A 3D chiral Zn(ii) coordination polymer with triple Zn–oba–Zn helical chains (oba = 4,4′-oxybis(benzoate))
Source: Royal Society of Chemistry journal article supplement (doi:10.1039/b708479j), 2007-01-01
Supplement: b708479j.pdf [file b708479j.pdf]

## A 3D chiral Zn(II) coordination polymer with triple Zn-oba-Zn helical chains (oba = 4,4'-oxybis(benzoate))

Yi Ma,<sup>a</sup> Zhengbo Han,<sup>\*a</sup> Yongke He<sup>a</sup> and Liguo Yang<sup>b</sup>

<sup>a</sup>*School of Chemical Science and Engineering, Liaoning University, Shenyang 110036 P.R. China*

<sup>b</sup>*College of Chemistry, Jilin University, Changchun 130012 P. R. China*

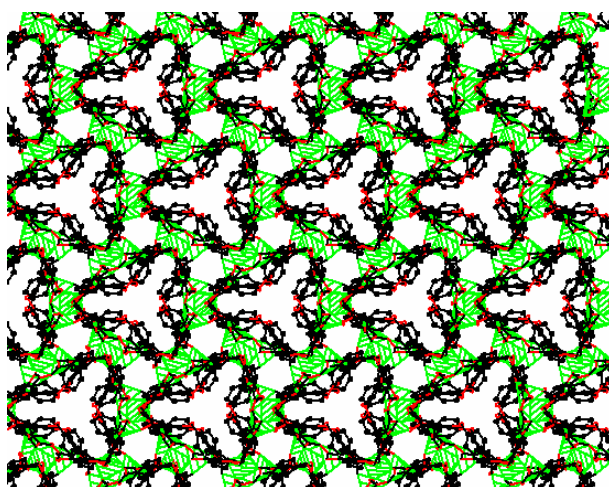

**Fig. S1** The polyhedron representation of the 3D chiral metal-organic framework of **1** viewed along the *c*-axis.

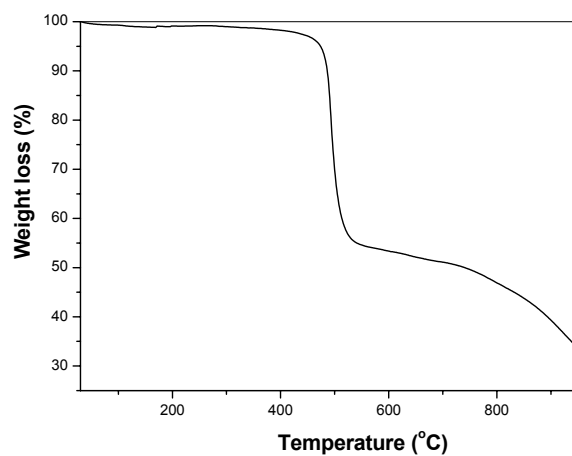

**Fig. S2** TGA curve of **1**.

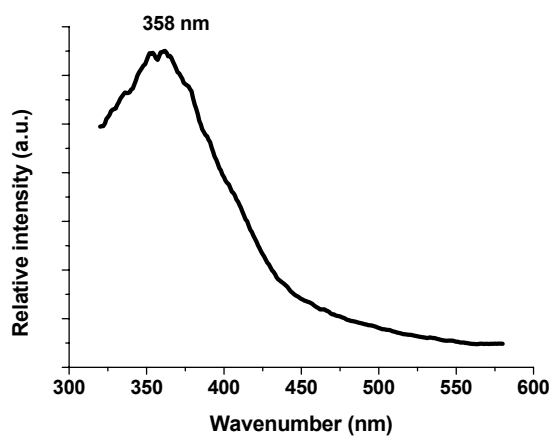

**Fig. S3** The photoluminescent spectra of **1** in the solid state at room temperature.

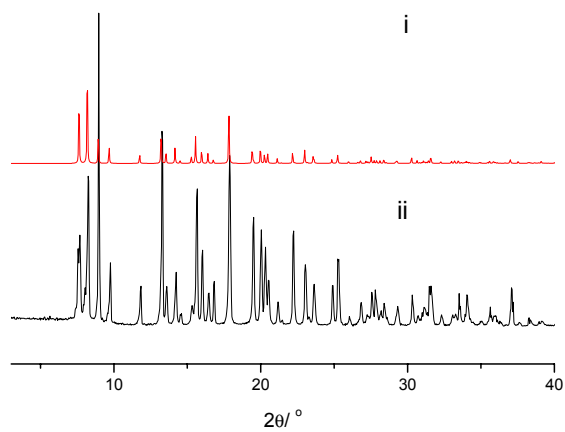

**Fig. S4** Simulated (i) and experimental (ii) X-ray powder diffraction patterns of **1**.

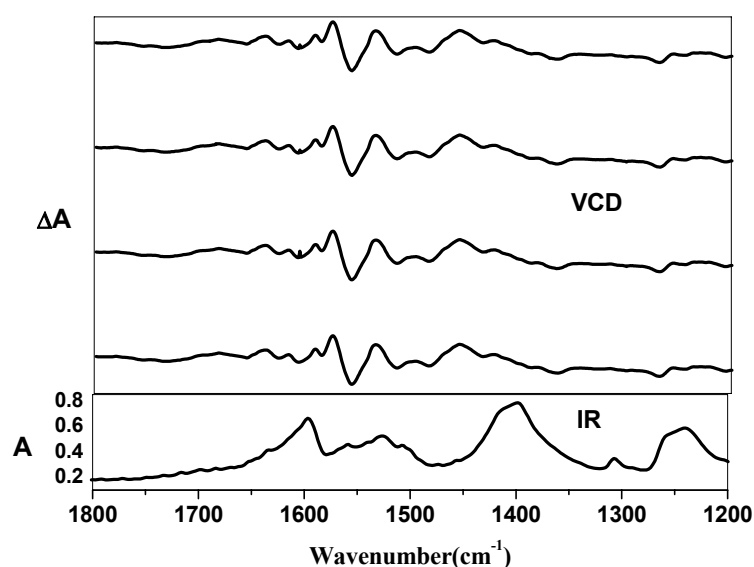

**Fig. S5.** Experiment IR (lower frame) and VCD (upper frame) spectra of **1** from different experiments, Infrared absorption spectra of KBr powder-pressed pellets were recorded on a Bruker Vector 22 FTIR spectrometer (resolution: 4 cm<sup>-1</sup>). VCD spectra of KBr powder-pressed pellets samples were recorded on a Bruker Vector 22 FTIR spectrometer equipped with the VCD/IRRAS module PMA 37 with a reasonable S/N ratio (resolution: 4 cm<sup>-1</sup>; zero filling factor: 2; scan time: 3 h) to which the following elements were added (in order): (1) linear polarizer; (2) ZnSe photoelastic modulator set at a modulation frequency of 50 kHz; (3) sample holder; (4) lens to focus the parallel beam on the detector element; (5) optical filter to prevent detector saturation; (6) D313/Q MCT detector especially selected for low noise; (7) pre-amplifier. The signal from the detector could be switched from one path that passed the electronic signal directly to the A/D converter (the “DC” signal containing the absorption interferogram) to a second path that passed through high-pass and low-pass filters and a SR830 lock-in amplifier (the “AC” signal containing the VCD interferogram).
